# Supplementary material
Source: publisher site journal article supplement (https://www.dovepress.com/article/499361)
Supplement: Supplementary file 1 [file get_supplementary_file.php]

**Supplementary figure 1. Number of operations by date for included patients**

**Supplementary table 1**: **Percentage total weight loss by type of surgery split by gender with 95% confidence intervals**

| **Time (months)** | **Female RYGB** | **Female SG** | **Male RYGB** | **Male SG** |
| --- | --- | --- | --- | --- |
| 3 | 17.2% (16.2-18.2) n=144 | 15.2% (14.9-15.5) n=1342 | 18.3% (16.1-20.6) n=39 | 17.5% (17.1-18) n=819 |
| 6 | 25.1% (23.9-26.3) n=118 | 23% (22.6-23.3) n=1175 | 25.2% (22.9-27.4) n=36 | 26.6% (26.1-27.1) n=704 |
| 12 | 31.4% (30-32.8) n=109 | 28.4% (27.9-28.9) n=1019 | 30.8% (28.2-33.5) n=34 | 32.5% (31.8-33.2) n=568 |
| 18 | 32% (30.4-33.7) n=89 | 29% (28.3-29.6) n=720 | 30.3% (27.2-33.4) n=32 | 32.8% (31.8-33.8) n=395 |
| 24 | 31.5% (29.6-33.3) n=75 | 27.7% (26.9-28.5) n=559 | 32.6% (29.9-35.4) n=21 | 31.2% (30-32.5) n=305 |
| 36 | 30.6% (28.4-32.9) n=54 | 25% (23.9-26) n=368 | 31.9% (27.9-35.8) n=15 | 27.5% (25.9-29.1) n=194 |
| 48 | 28.2% (24.2-32.2) n=21 | 23.6% (22.2-24.9) n=202 | 26.3% (15.8-36.8) n=4 | 25.6% (23.3-27.9) n=106 |
| 60 | 26.7% (20.1-33.3) n=10 | 22.1% (19.9-24.2) n=83 | 34.3% (30.8-37.7) n=3 | 25.2% (22.1-28.3) n=60 |

Abbreviations: SG sleeve gastrectomy; RYGB Roux-en-Y gastric bypass

## **Supplementary table 2**: **Type 2 diabetes proportion of remission by type of surgery**

1. **Type 2 diabetes complete remission (HbA1c <6%)**

| Time  (months) | Proportion in  Remission RYGB+SG | Proportion in Remission  RYBG | Proportion in  Remission  SG | Significance  RYGB vs SG |
| --- | --- | --- | --- | --- |
| 3 | 202/435 | 30 /70 (42.9%) | 172/365 (47.1%) | p=0.600 |
| 6 | 206/378 | 35/63 (55.6%) | 171/315 (54.3%) | p=0.963 |
| 12 | 187/346 | 32/57 (56.1%) | 155/289 (53.6%) | p=0.840 |
| 18 | 134/282 | 27/54 (50%) | 107/228 (46.9%) | p=0.799 |
| 24 | 74/242 | 25/47 (53.2%) | 69/195 (35.4%) | p=0.037 * |
| 36 | 75/199 | 19/35 (54.3%) | 56 /164 (34.1%) | p=0.041 * |
| 48 | 30/112 | 3/13 (23.1%) | 27/99 (27.3%) | p=1.000 |
| 60 | 16/51 | 1/7 (14.3%) | 15 /44 (34.1%) | p=0.541 |

1. **Type 2 diabetes total remission (complete + partial; HbA1c <6.5%)**

| Time  (months) | Proportion in  Remission RYGB+SG | Proportion in Remission  RYBG | Proportion in  Remission  SG | Significance  RYGB vs SG |
| --- | --- | --- | --- | --- |
| 3 | 255/435 | 39/70 (55.7%) | 216/365 (59.2%) | p=0.684 |
| 6 | 238/378 | 38/63 (60.3%) | 200/315 (63.5%) | p=0.739 |
| 12 | 214/346 | 35/57 (61.4%) | 179/289 (61.9%) | p=1.000 |
| 18 | 149/282 | 29/54 (53.7%) | 120/228 (52.6%) | p=1.000 |
| 24 | 110/242 | 27/47 (57.4%) | 83/195 (42.6%) | p=0.094 |
| 36 | 85/199 | 23/35 (65.7%) | 62/164 (37.8%) | p=0.005 ** |
| 48 | 36/112 | 3/13 (23.1%) | 33/99 (33.3%) | p=0.668 |
| 60 | 21/51 | 3/7 (42.9%) | 18 /44 (40.9%) | p=1.000 |

Abbreviations: SG sleeve gastrectomy; RYGB Roux-en-Y gastric bypass; * = p<0.05; ** = p<0.01

**Supplementary table 3: Hyperlipidemia proportion of remission by type of surgery**

| Time  (months) | Proportion in  Remission RYGB+SG | Proportion in Remission  RYBG | Proportion in  Remission  SG | Significance  RYGB vs SG |
| --- | --- | --- | --- | --- |
| 3 | 128/837 | 29/85 (34.1%) | 99/752 (13.2%) | p<0.001 *** |
| 6 | 97/646 | 26/64 (40.6%) | 71/582 (12.2%) | p<0.001 *** |
| 12 | 101/530 | 23/55 (41.8%) | 78/475 (16.4%) | p<0.001 *** |
| 18 | 99/417 | 28/64 (43.8%) | 71/353 (20.1%) | p<0.001 *** |
| 24 | 70/334 | 21/45 (46.7%) | 49/89 (17%) | p<0.001 *** |
| 36 | 45/251 | 14/34 (41.2%) | 31/217 (14.3%) | P<0.001 *** |
| 48 | 24/153 | 6/14 (42.9%) | 18/139 (12.9%) | p=0.011 * |
| 60 | 14/72 | 4/8 (50%) | 10/64 (15.6%) | p=0.065 |

Abbreviations: SG sleeve gastrectomy; RYGB Roux-en-Y gastric bypass; * = p<0.05; *** = p<0.001

**Supplementary table 4: Hypertension proportion of remission by type of surgery**

1. **complete remission**

| Time  (months) | Proportion in  Remission (RYGB+SG) | Proportion in Remission  RYBG | Proportion in  Remission  SG | Significance  RYGB vs SG |
| --- | --- | --- | --- | --- |
| 3 | 88/372 | 13/39 (33.3%) | 75/333 (22.5%) | p=0.192 |
| 6 | 88/302 | 12/33 (36.4%) | 76/269 (28.3%) | p=0.444 |
| 12 | 93/292 | 7/29 (24.1%) | 86/263 (32.7%) | p=0.466 |
| 18 | 78/244 | 6/28 (21.4%) | 72/216 (33.3%) | p=0.291 |
| 24 | 63/202 | 8/25 (32%) | 55/177 (31.1%) | p=1.000 |
| 36 | 41/181 | 8/16 (50%) | 33/165 (20%) | p=0.015 * |
| 48 | 14/85 | 1/6 (16.7%) | 13/79 (16.5%) | p=1.000 |
| 60 | 5/47 | 1/2 (50%) | 4/45 (8.9%) | p=0.501 |

1. **total remission (complete plus partial)**

| Time  (months) | Proportion in  Remission (RYGB+SG) | Proportion in Remission  RYBG | Proportion in  Remission  SG | Significance  RYGB vs SG |
| --- | --- | --- | --- | --- |
| 3 | 216/372 | 24 of 39 (61.5%) | 192 of 333 (57.7%) | p=0.769 |
| 6 | 194/302 | 18 of 33 (54.5%) | 176 of 269 (65.4%) | p=0.299 |
| 12 | 196/292 | 17 of 29 (58.6%) | 179 of 263 (68.1%) | p=0.413 |
| 18 | 156/244 | 18 of 28 (64.3%) | 138 of 216 (63.9%) | p=1.000 |
| 24 | 136/202 | 17 of 25 (68%) | 119 of 177 (67.2%) | p=1.000 |
| 36 | 102/181 | 10 of 16 (62.5%) | 92 of 165 (55.8%) | p=0.799 |
| 48 | 39/85 | 2 of 6 (33.3%) | 37 of 79 (46.8%) | p=0.830 |
| 60 | 21/47 | 1 of 2 (50%) | 20 of 45 (44.4%) | p=1.000 |

Abbreviations: SG sleeve gastrectomy; RYGB Roux-en-Y gastric bypass; * = p<0.05
